# Supplementary material for: Activation of the Liver X Receptor by Agonist TO901317 Improves Hepatic Insulin Resistance via Suppressing Reactive Oxygen Species and JNK Pathway
Source: PubMed Central journal article supplement (PMC4409387; doi:10.1371/journal.pone.0124778), 2015-04-24

S2 Fig

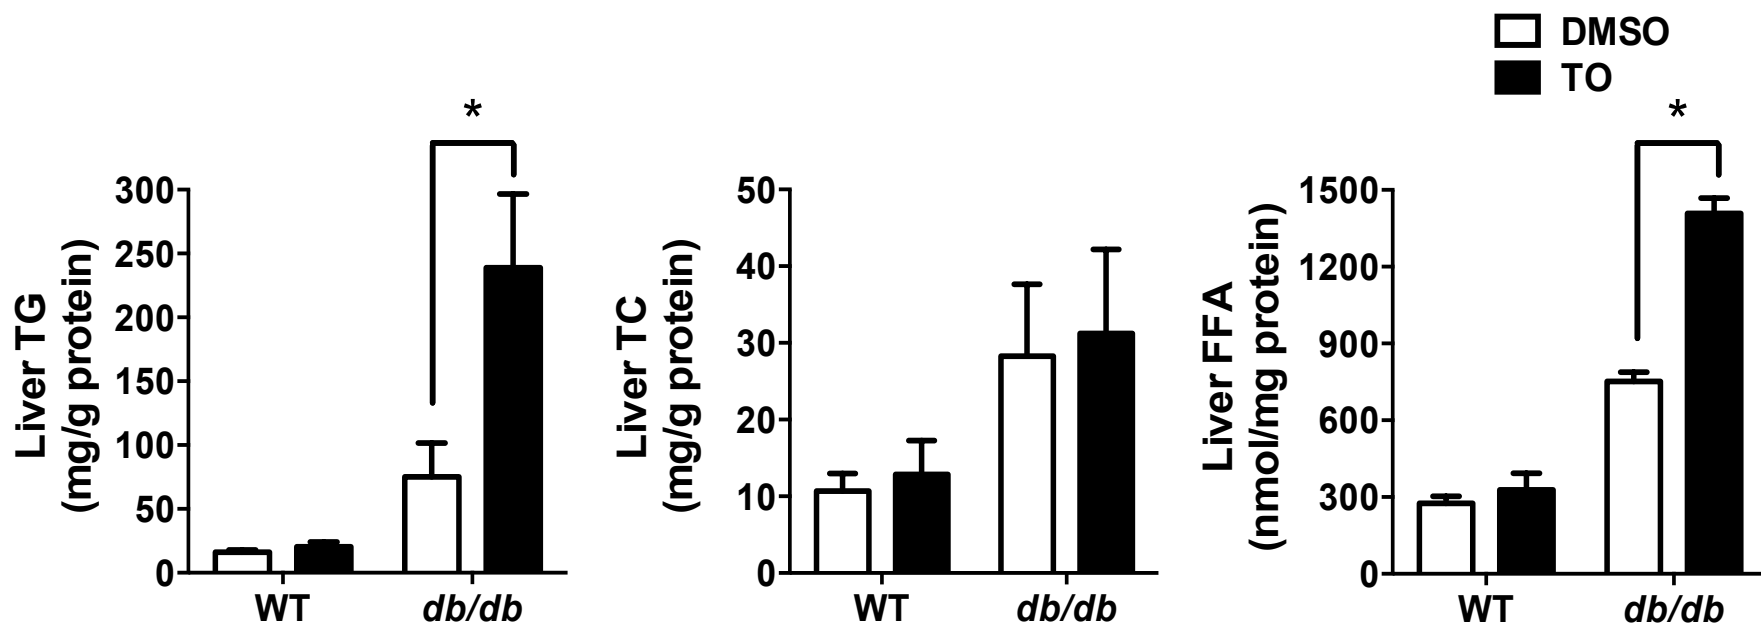

Supplement: pone.0124778.s002.pdf [file pone.0124778.s002.pdf]
