# Supplementary material for: Activation of the Liver X Receptor by Agonist TO901317 Improves Hepatic Insulin Resistance via Suppressing Reactive Oxygen Species and JNK Pathway
Source: PubMed Central journal article supplement (PMC4409387; doi:10.1371/journal.pone.0124778), 2015-04-24
Supplement: pone.0124778.s005.pdf [file pone.0124778.s005.pdf]

**S1 Table. Sequences of the primers used in real-time PCR**

| <b>GENES</b>     | <b>SPECIES</b> | <b>FORWARD PRIMER</b>    | <b>REVERSE PRIMER</b>    |
|------------------|----------------|--------------------------|--------------------------|
| <b>Nrf2</b>      | Mouse          | AGTCCCAGCAGGACATGGATT    | AGTTGCTCTTGTCTTTCCTTTTCG |
| <b>Mn-SOD</b>    | Mouse          | GGCCAAGGGAGATGTTACAACCTC | CCAAAGTCACGCTTGATAGCCT   |
| <b>Zn/CU-SOD</b> | Mouse          | TGCAGGGAACCATCCACTTC     | AAATGAGGTCCTGCACTGGTACA  |
| <b>HMOX-1</b>    | Mouse          | GTCTCGAGCATAGCCCGGA      | TTCTCGGCTTGGATGTGTACCT   |
| <b>γ-GCS</b>     | Mouse          | ATCTGCTTTGCTGTCGGTGC     | CAATTTTGTCCCAACTTCAGGC   |
| <b>NQO1</b>      | Mouse          | CTACGCCATGAAGGAGGCTG     | CGGAAGGATACTGAAAGTTCTTCG |
| <b>CAT</b>       | Mouse          | GCAGCTCCGCAATCCTACAC     | CCCCGCGGTCATGATATTAA     |
| <b>GP91</b>      | Mouse          | TGATCCTGCTGCCAGTGTGTC    | GTGAGGTTCTGTCCAGTTGTCTTC |
| <b>β-actin</b>   | Mouse          | CCTTCTACAATGAGCTGCGTG    | ACAGCCTGGATAGCAACGTAC    |
| <b>Nrf2</b>      | Human          | GAAACCAGTGGATCTGCCAACT   | TCGATGTGACCGGGAATATCA    |
| <b>Mn-SOD</b>    | Human          | CCCGACCTGCCCTACGACTA     | GATGGCTTCCAGCAACTCCC     |
| <b>GAPDH</b>     | Human          | CCTTCTACAATGAGCTGCGTG    | ACAGCCTGGATAGCAACGTAC    |
